# Supplementary material for: Layer-by-layer self-assembled hybrid multilayer films based on poly(sodium 4-styrenesulfonate) stabilized graphene with polyaniline and their electrochemical sensing properties
Source: Royal Society of Chemistry journal article supplement (doi:10.1039/c3ra42426j), 2013-01-01
Supplement: c3ra42426j.pdf [file c3ra42426j.pdf]

## Supporting information

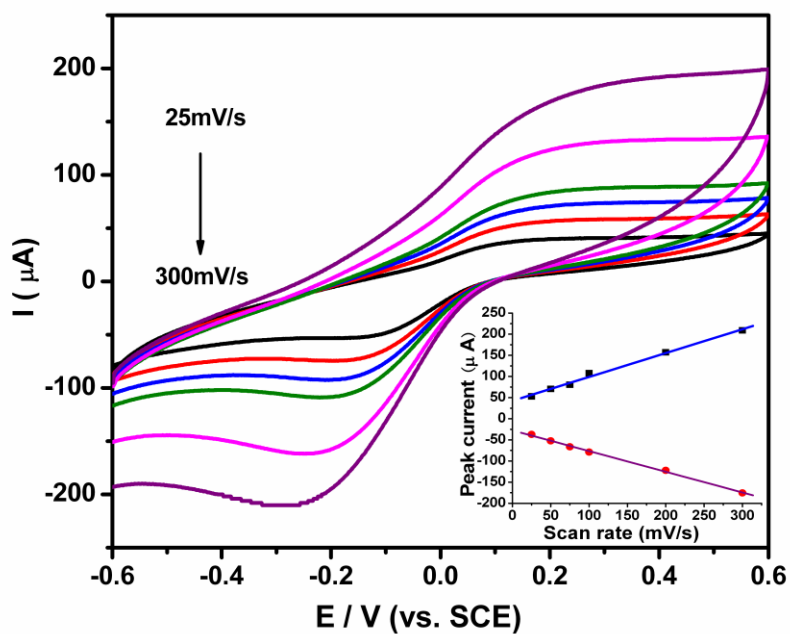

**Fig. S1** Cyclic voltammograms of (PSS-GS/PANI)<sub>6</sub> multilayer film in PBS buffers (pH 7.2) with different scan rates.

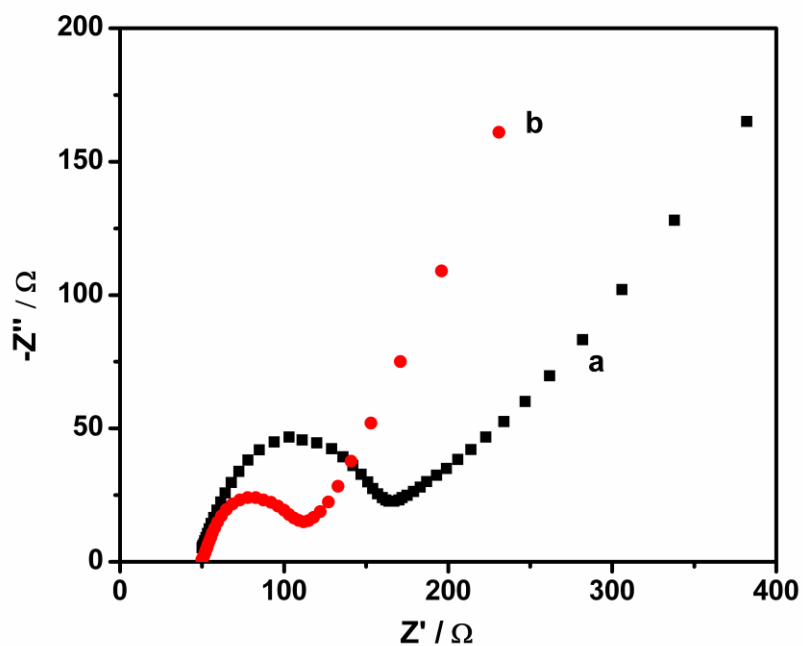

**Fig. S2** Nyquist plots of electrochemical impedance spectroscopy on (a) a bare ITO electrode and (b) (PSS-GS/PANI)<sub>6</sub> modified electrode in 5 mM Fe(CN)<sub>6</sub><sup>3-</sup>. Electrolyte: 0.1 M KCl.

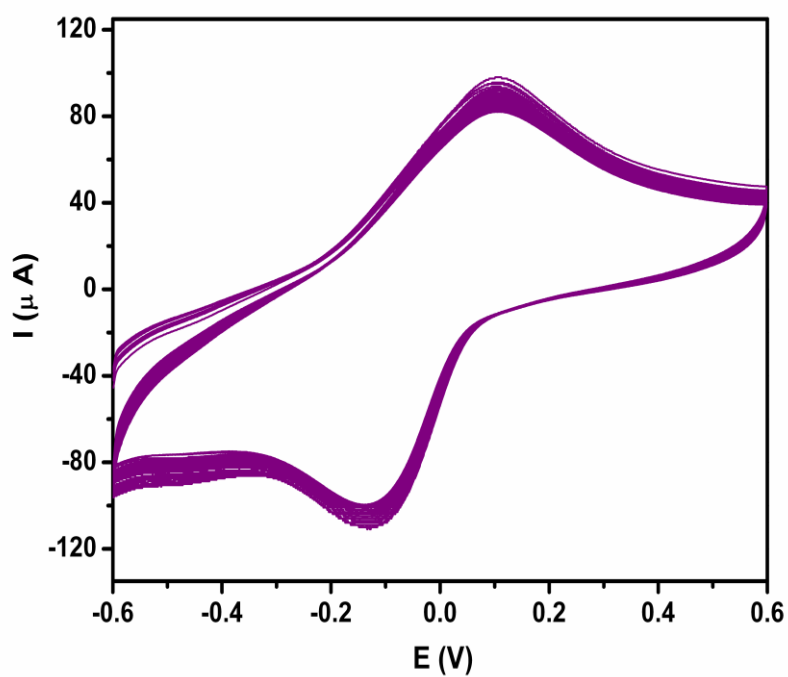

**Fig. S3** Cyclic voltammograms of (PSS-GS/PANI)<sub>6</sub> modified electrode in 0.1 M PBS

buffer solution, pH 7.2 upon repeated cyclic potential scan. Scan rate was 100 mV/s.

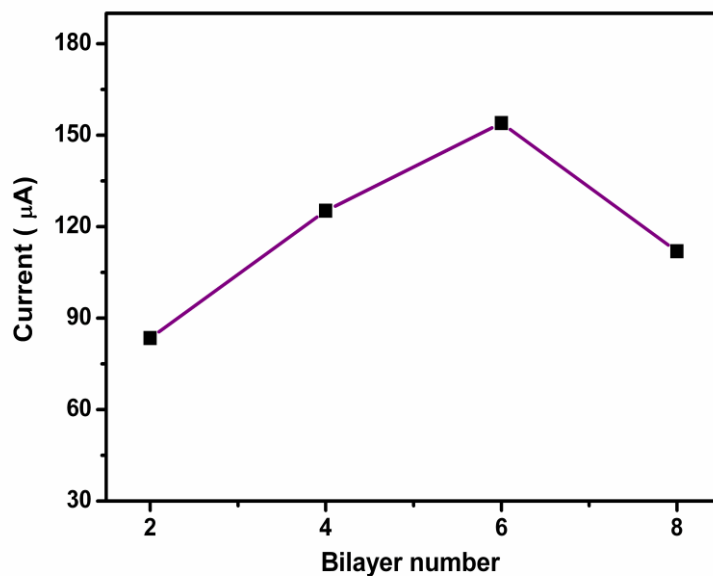

**Fig. S4** Dependence of the response of the electrode modified with (PSS-GS/PANI)<sub>n</sub> (n= 2, 4, 6, 8) to 1.0 mmol L<sup>-1</sup> H<sub>2</sub>O<sub>2</sub> measured at -0.3 V.

**Table S1** A comparison of this work with literature work regarding the performance of the H<sub>2</sub>O<sub>2</sub> using an electrode modified with different materials.

| Electrode material         | Detection limit(µM) | Linear range (mM) | Reference                            |
|----------------------------|---------------------|-------------------|--------------------------------------|
| Graphene/AuNPs/chitosan    | 180                 | 0.2~4.2           | Biosens.Bioelectron., 2010, 25, 1070 |
| MWNTs/chitosan             | 10                  | 0.0167~0.74       | Talanta 2006, 68, 721                |
| Ag/graphene                | 28                  | 0.1~40            | Macromolecules 2010, 43, 10078       |
| graphene/Nafion/Azure I/Au | 10                  | 0.03~5            | Electrochimica Acta 2013, 90, 550    |

|              |    |            |                                            |
|--------------|----|------------|--------------------------------------------|
| PEDOT/AgNPs  | 7  | –          | Electroanalysis, 2009, <b>21</b> ,<br>1419 |
| AgNPs/SBA-15 | 12 | 0.049–970  | <i>J. Nanomater.</i> , 2008, 1,<br>473791  |
| HRP/PANI     | –  | 0.1~0.5    | Electroanalysis 2009, 21,<br>595           |
| CAT/PANI     | –  | 0.064~1 mM | Biotech. Bioproc. Engin.<br>2009, 14, 443  |
| PSS-GS/PANI  | 6  | 0.1~1.5    | This work                                  |

Au NPs: Au nanoparticles; MWNTs: Multiwalled carbon nanotubes; PEDOT: poly[3,4-ethylenedioxythiophene]; Ag NPs: Ag nanoparticles; HRP: horseradish peroxidase; CAT: catalase
